# Supplementary material for: The correlation between fibroblast growth factor-23 and ESRD patients with hearing impairment
Source: PeerJ. 2021 Oct 13;9:e12295. doi: 10.7717/peerj.12295 (PMC8520394; doi:10.7717/peerj.12295)
Supplement: Supplemental Information 1 [file peerj-09-12295-s001.xlsx]

## Sheet: 数据汇总20210224
Number	Age	Gender	Hight	Weight	BMI	Smoking	Hypertension	DM	Noise Explosure	ALB	Hb	L250	L500	L1000	L2000	L4000	L8000	R250	R500	R1000	R2000	R4000	R8000	L average threshold	R average threshold	FGF23	Klotho	Cre	BUN	Treatment times	PTH	Calcium	Phosphorus	Potassium	Hearing threshold250＞25	Hearing threshold500＞25	Hearing threshold1000＞25	Hearing threshold2000＞25	Hearing threshold4000＞25	Hearing threshold8000＞25	LHI	RHI	DHI
1	65	1	1.51	45.2	19.82	0	1	0	1	35.4	109	40	40	10	5	30	80	25	30	10	5	30	45	21.25	18.75	976.84	16.41	1017.2	29.5	41	179.2	2.25	2.43	5.23	1	1	0	0	1	1	1	1	1
2	59	1	1.54	58.8	24.79	0	0	1	0	46.49	131	35	40	45	60	60	80	40	40	45	55	70	85	51.25	52.5	1486.52	15.33	952.06	27.21	16	74.03	2.62	2.15	5.38	1	1	1	1	1	1	1	1	1
3	66	1	1.52	45.7	19.78	0	1	0	1	35.8	110	40	40	10	5	30	80	25	30	10	5	30	45	21.25	18.75	976.56	16.33	1016.9	29.4	40	181	2.33	2.29	5.22	1	1	0	0	1	1	1	1	1
4	48	1	1.64	52.35	19.46	0	1	0	1	48.37	135	5	15	30	35	35	50	15	15	20	30	30	50	28.75	23.75	1445.88	16.84	1246.32	40.88	76	724	2.52	1.67	6.3	0	0	1	1	1	1	1	1	1
5	64	1	1.56	47.7	19.6	0	1	0	1	35.3	111	40	40	10	5	30	80	25	30	10	5	30	45	21.25	18.75	976.55	16.39	1017.11	29.48	43	180.4	2.14	2.51	5.18	1	1	0	0	1	1	1	1	1
6	62	1	1.57	50.8	20.6035	0	1	0	0	40.49	125	40	20	30	30	30	60	25	20	25	35	35	60	27.5	28.75	1187.87	23.53	632.59	15.16	22	390.4	2.58	1.14	3.49	1	0	1	1	1	1	1	1	1
7	58	1	1.55	60.1	25	0	0	1	0	46.4	132	35	40	45	60	60	80	40	40	45	55	70	85	51.25	52.5	1486.34	15.46	951	27.2	17	73.96	2.61	2.19	5.39	1	1	1	1	1	1	1	1	1
8	62	1	1.51	56	24.56	0	1	1	0	47.37	131	20	15	20	10	15	35	20	10	15	10	15	40	15	12.5	482.22	13.73	885.77	32.3	41	906.19	2.46	2.27	5.85	0	0	0	0	0	1	1	1	1
9	49	1	1.65	53	19.4674	0	1	0	1	48.41	131	5	15	30	35	35	50	15	15	20	30	30	50	28.75	23.75	1445.87	16.82	1246.31	40.84	74	723.5	2.51	1.71	6.34	0	0	1	1	1	1	1	1	1
10	63	1	1.56	50.1	20.58	0	1	0	0	40.61	130	40	20	30	30	30	60	25	20	25	35	35	60	27.5	28.75	1187.89	23.55	632.51	15.24	26	390	2.57	1.18	3.5	1	0	1	1	1	1	1	1	1
11	47	1	1.66	53.65	19.4674	0	1	0	1	48.42	130	5	15	30	35	35	50	15	15	20	30	30	50	28.75	23.75	1445.86	16.83	1246.27	40.83	75	722.7	2.53	1.69	6.35	0	0	1	1	1	1	1	1	1
12	59	1	1.52	47.5	20.56	0	1	0	0	40.4	126	40	20	30	30	30	60	25	20	25	35	35	60	27.5	28.75	1187.91	23.6	632.7	15.05	21	389.9	2.53	1.13	3.45	1	0	1	1	1	1	1	1	1
13	64	1	1.53	47.74	20.39	0	1	0	0	42.39	116	25	20	35	40	40	65	35	20	30	40	45	60	33.75	33.75	1027.1	21.94	619.6	13.41	134	87.37	2.59	1.56	4.71	1	0	1	1	1	1	1	1	1
14	64	1	1.53	56.5	24.14	0	1	1	0	47.42	131	20	15	20	10	15	35	20	10	15	10	15	40	15	12.5	482.4	13.74	885.82	31.9	36	906.2	2.42	2.23	5.8	0	0	0	0	0	1	1	1	1
15	68	1	1.57	49.5	20.08	0	1	0	0	42.41	113	25	20	35	40	40	65	35	20	30	40	45	60	33.75	33.75	1027.06	21.9	619.2	13.36	130	87.41	2.55	1.52	4.75	1	0	1	1	1	1	1	1	1
16	60	1	1.59	62.9	24.88	0	0	1	0	46.61	133	35	40	45	60	60	80	40	40	45	55	70	85	51.25	52.5	1486.4	15.5	952.94	27.16	21	74.01	2.59	2.14	5.43	1	1	1	1	1	1	1	1	1
17	67	1	1.52	46.76	20.24	0	1	0	0	42.4	113	25	20	35	40	40	65	35	20	30	40	45	60	33.75	33.75	1027.05	21.89	619.1	13.37	129	87.42	2.54	1.51	4.76	1	0	1	1	1	1	1	1	1
18	63	1	1.55	58.5	24.3496	0	1	1	0	47.41	128	20	15	20	10	15	35	20	10	15	10	15	40	15	12.5	482.34	13.78	885.81	32	40	906.21	2.41	2.24	5.81	0	0	0	0	0	1	1	1	1
19	56	1	1.54	42.8	18.05	0	1	0	0	45.19	124	15	25	20	15	25	25	20	15	10	15	10	35	21.25	12.5	580.07	12.09	814.37	26.82	49	1165.32	2.33	2.48	5.67	0	0	0	0	0	1	0	1	0
20	67	1	1.57	44.6	18.09	0	1	0	0	41.63	70	20	30	30	35	35	55	20	30	30	35	30	60	32.5	31.25	824.03	19.06	733.97	29.01	105	484.32	2.47	2.34	4.9	0	1	1	1	1	1	1	1	1
21	56	1	1.58	45.2	18.1061	0	1	0	0	45.23	119	15	25	20	15	25	25	20	15	10	15	10	35	21.25	12.5	580.12	12.05	814.41	26.81	53	1165.31	2.37	2.52	5.68	0	0	0	0	0	1	0	1	0
22	70	1	1.53	42.32	18.0802	0	1	0	0	41.61	65	20	30	30	35	35	55	20	30	30	35	30	60	32.5	31.25	824.04	19.02	734.01	28.99	100	484.31	2.45	2.35	4.86	0	1	1	1	1	1	1	1	1
23	56	1	1.53	42.5	18.15	0	1	0	0	45.18	123	15	25	20	15	25	25	20	15	10	15	10	35	21.25	12.5	580.08	12.1	814.42	26.77	48	1165.27	2.38	2.53	5.72	0	0	0	0	0	1	0	1	0
24	67	1	1.58	45.08	18.05	0	1	0	0	41.56	69	20	30	30	35	35	55	20	30	30	35	30	60	32.5	31.25	824.08	19.01	734.02	28.94	101	484.27	2.46	2.36	4.91	0	1	1	1	1	1	1	1	1
25	67	1	1.57	61.6	25	0	1	0	0	39.29	96	25	15	15	20	20	35	20	15	15	10	25	20	17.5	16.25	30.46	13.81	936.17	39.32	64	371.02	2.05	1.88	6.01	0	0	0	0	0	1	1	0	0
26	56	1	1.63	78	29.36	0	1	1	0	42.72	138	20	20	15	15	15	25	40	35	30	25	35	20	16.25	31.25	67.96	16.02	1159.67	35.85	60	347.67	2.39	2.07	6.81	1	1	1	0	1	0	0	1	0
27	68	1	1.61	64.8	25	0	1	0	0	39.31	99	25	15	15	20	20	35	20	15	15	10	25	20	17.5	16.25	30.5	13.77	936.21	39.28	68	371.01	2.03	1.87	6.06	0	0	0	0	0	1	1	0	0
28	55	1	1.68	83	29.4	0	1	1	0	42.67	139	20	20	15	15	15	25	40	35	30	25	35	20	16.25	31.25	67.91	16.03	1159.72	35.8	59	347.72	2.37	2.06	6.82	1	1	1	0	1	0	0	1	0
29	66	1	1.62	65.6	25	0	1	0	0	39.3	99	25	15	15	20	20	35	20	15	15	10	25	20	17.5	16.25	30.51	13.76	936.22	39.27	69	370.97	2.04	1.86	6.05	0	0	0	0	0	1	1	0	0
30	70	1	1.5	47.5	21.111	0	1	0	0	40.6	96	30	25	30	25	35	30	25	20	25	30	35	30	28.75	27.5	691.31	18.18	984.5	23.51	20	543.3	2.15	1.42	4.64	1	0	1	1	1	1	1	1	1
31	33	1	1.6	72.8	28.4375	0	1	0	0	39.4	95	5	10	10	10	5	5	5	10	0	5	5	5	8.75	5	768.94	17.43	661.7	13.75	5	281.9	2.24	1.79	5.13	0	0	0	0	0	0	0	0	0
32	68	1	1.58	49	19.6282	0	1	0	0	38.7	78	15	20	20	20	55	55	20	20	25	25	25	50	28.75	23.75	952.4	15.98	1043	22.08	12	334.9	2.21	1.9	4.93	0	0	0	0	1	1	1	1	1
33	56	1	1.65	80	29.3847	0	1	1	0	42.7	138	20	20	15	15	15	25	40	35	30	25	35	20	16.25	31.25	67.94	16.01	1159.7	35.82	59	347.7	2.38	2.07	6.8	1	1	1	0	1	0	0	1	0
34	67	1	1.6	64	25	0	1	0	0	39.3	98	25	15	15	20	20	35	20	15	15	10	25	20	17.5	16.25	30.49	13.78	936.2	39.29	67	371	2.04	1.87	6.04	0	0	0	0	0	1	1	0	0
35	34	0	1.68	66.5	23.5615	1	1	0	1	41.1	96	20	10	15	25	60	15	20	15	10	15	60	20	27.5	25	170.26	17.4	1365.8	21.5	7	133.3	2.2	1.79	6.03	0	0	0	0	1	0	1	1	1
36	38	1	1.58	68.5	27.4395	0	1	0	0	36.4	94	10	10	15	15	20	15	10	10	15	15	25	15	15	16.25	53.68	14.12	1124.4	31.55	8	109.6	2.7	2.75	4.04	0	0	0	0	0	0	0	0	0
37	38	1	1.62	46	17.5278	0	1	0	0	43.9	82	15	10	25	25	15	25	20	15	15	20	10	25	18.75	15	736.85	19.25	1001.3	21.57	30	903.7	2.78	2.46	5.79	0	0	0	0	0	0	0	0	0
38	68	1	1.56	44	18.0802	0	1	0	0	41.6	68	20	30	30	35	35	55	20	30	30	35	30	60	32.5	31.25	824.05	19.03	734	28.98	102	484.3	2.46	2.35	4.89	0	1	1	1	1	1	1	1	1
39	61	0	1.7	65	22.4913	0	1	0	0	48.3	132	20	30	50	40	55	70	15	25	40	40	40	70	43.75	36.25	742.31	18.52	1090.8	26.36	34	177.6	2.27	2.24	5.25	0	1	1	1	1	1	1	1	1
40	46	0	1.7	57.5	19.8961	0	1	0	0	47.5	122	15	25	25	35	45	30	20	25	20	20	35	40	32.5	25	1154.84	22.24	527.3	10.56	96	292.6	2.62	2.81	5.34	0	0	0	1	1	1	1	1	1
41	56	1	1.55	43.5	18.1061	0	1	0	0	45.2	122	15	25	20	15	25	25	20	15	10	15	10	35	21.25	12.5	580.09	12.08	814.4	26.8	50	1165.3	2.36	2.51	5.69	0	0	0	0	0	1	0	1	0
42	37	0	1.68	85.7	30.3642	1	1	0	0	40.8	118	25	30	30	25	30	35	20	25	25	25	30	45	28.75	26.25	1049.48	13.87	614.5	24.75	55	221	2.2	1.98	4.47	0	1	1	0	1	1	1	1	1
43	50	0	1.67	63	22.5895	0	1	0	0	38.4	96	15	15	10	5	25	25	20	20	15	10	25	30	13.75	17.5	660.93	17.58	1090	38.45	24	425.4	2.27	1.71	5.77	0	0	0	0	0	1	0	1	0
44	28	1	1.55	41	17.0655	0	1	0	0	42.7	121	20	15	15	10	15	15	25	20	20	5	10	20	13.75	13.75	500.28	16.5	1057.6	29.32	57	617.5	2.36	1.9	4.19	0	0	0	0	0	0	0	0	0
45	31	1	1.61	58	22.3756	0	0	0	1	49.4	105	20	15	15	10	10	5	20	15	15	15	25	15	12.5	17.5	976.65	18.14	1218.3	25.39	50	1156.9	2.6	2.2	5.18	0	0	0	0	0	0	0	0	0
46	41	0	1.75	77	25.1428	0	1	0	0	47.5	162	40	30	30	20	20	20	20	25	25	20	15	30	25	21.25	1220.06	19.98	1312	26.54	31	638.6	2.16	2.75	4.9	1	1	1	0	0	1	1	1	1
47	65	1	1.54	48	20.24	0	1	0	0	42.4	114	25	20	35	40	40	65	35	20	30	40	45	60	33.75	33.75	1027.07	21.91	619.3	13.38	131	87.4	2.56	1.53	4.74	1	0	1	1	1	1	1	1	1
48	60	1	1.55	49.5	20.6035	0	1	0	0	40.5	127	40	20	30	30	30	60	25	20	25	35	35	60	27.5	28.75	1187.88	23.56	632.6	15.15	23	390.1	2.56	1.15	3.48	1	0	1	1	1	1	1	1	1
49	33	0	1.63	57	21.45	1	1	0	1	48.7	98.4	20	20	15	10	40	40	20	25	20	20	25	35	21.25	22.5	508.96	15.82	1036.1	22.35	85	1974.6	2.5	2.1	5.8	0	0	0	0	1	1	1	1	1
50	25	1	1.68	47	16.6524	0	1	0	0	49.5	106	10	5	5	10	15	5	15	5	5	0	5	0	8.75	3.75	725.78	13.14	785.6	24.37	21	356.5	2.5	1.9	5.17	0	0	0	0	0	0	0	0	0
51	56	0	1.74	79.3	26.2584	0	1	1	0	51	112	35	30	25	20	50	50	35	20	15	20	50	35	31.25	26.25	1085.76	15.39	1033.5	24.29	35	253.5	2.31	1.91	5.78	1	1	0	0	1	1	1	1	1
52	37	0	1.75	53	17.31	0	1	0	0	46.3	90	10	15	30	35	70	65	20	15	25	25	60	65	37.5	31.25	774.14	15	1414.6	29.71	155	1386	2.44	2.28	5.5	0	0	1	1	1	1	1	1	1
53	28	0	1.75	55.5	18.1224	1	1	0	0	47.3	102	20	25	20	5	15	15	15	20	15	10	20	30	16.25	16.25	996.36	14.82	1334.6	27.04	31	1703.8	2.02	2.14	5.31	0	0	0	0	0	1	0	1	0
54	59	0	1.72	72	24.3374	1	1	1	0	42.1	119	25	25	30	30	40	50	30	20	25	20	35	50	31.25	25	1197.62	15.09	1160.3	24.09	55	1042.3	2.12	2.58	4.6	1	0	1	1	1	1	1	1	1
55	53	0	1.68	58.9	20.8687	0	1	0	0	42.3	111	40	25	35	45	50	70	20	20	20	35	50	100	38.75	31.25	1158.19	16.59	980.7	27.2	16	248.3	2.25	1.7	5.18	1	0	1	1	1	1	1	1	1
56	54	0	1.65	60	22.0385	0	1	0	0	35.4	109	15	20	20	20	30	40	15	15	15	20	25	45	22.5	18.75	1318.05	18.96	1619	29.07	27	331.8	2.19	2.52	5.46	0	0	0	0	1	1	1	1	1
57	47	1	1.65	53	19.4674	0	1	0	1	48.4	132	5	15	30	35	35	50	15	15	20	30	30	50	28.75	23.75	1445.85	16.81	1246.3	40.85	73	723.4	2.52	1.69	6.33	0	0	1	1	1	1	1	1	1
58	33	0	1.65	48	17.6308	0	1	0	1	47.8	163	35	20	10	20	85	85	25	15	10	10	60	70	33.75	23.75	1384.63	15.61	1082	22.49	18	130.8	2.3	2.17	5.02	1	0	0	0	1	1	1	1	1
59	53	0	1.66	60.9	22.1	0	1	0	0	34.5	110	15	20	20	20	30	40	15	15	15	20	25	45	22.5	18.75	1317.05	19.96	1609	28.77	26	321.8	2.1	2.42	5.36	0	0	0	0	1	1	1	1	1
60	58	1	1.56	60.6	24.9013	0	0	1	0	46.5	132	35	40	45	60	60	80	40	40	45	55	70	85	51.25	52.5	1486.42	15.43	952	27.19	18	74	2.61	2.16	5.4	1	1	1	1	1	1	1	1	1
61	64	1	1.53	46.2	19.74	0	1	0	1	35.5	110	40	40	10	5	30	80	25	30	10	5	30	45	21.25	18.75	976.65	16.31	1017.1	29.46	41	180.2	2.24	2.41	5.21	1	1	0	0	1	1	1	1	1
62	34	0	1.66	49	17.78	0	1	0	0	47.7	164	35	20	20	20	85	85	25	15	10	10	60	70	33.75	23.75	1384.36	16.61	1091	21.49	18	140	2.2	2.07	4.92	1	0	0	0	1	1	1	1	1
63	54	0	1.64	59	21.93	0	1	0	0	36.5	112	15	20	20	20	30	40	15	15	15	20	25	45	22.5	18.75	1319.05	17.96	1629	29.67	28	311.8	2.28	2.62	5.56	0	0	0	0	1	1	1	1	1
64	32	0	1.65	47.9	17.59	0	1	0	1	47.8	162	35	20	10	20	85	85	25	15	10	10	60	70	33.75	23.75	1385	14.61	1071	23.49	18	120.8	2.4	2.37	5.12	1	0	0	0	1	1	1	1	1
65	23	0	1.7	76	26.2975	0	1	0	0	42.7	95	10	5	15	5	20	5	10	5	5	5	15	5	11.25	7.5	1260.72	14.51	1574.6	27.08	19	453.7	2.29	2.84	5.18	0	0	0	0	0	0	0	0	0
66	29	0	1.77	57.5	18.35	1	1	0	0	49.3	103	20	25	20	5	15	15	15	20	15	10	20	30	16.25	16.25	999.4	14.92	1344.8	27.3	30	1733.5	1.84	2.4	5.22	0	0	0	0	0	1	0	1	0
67	56	0	1.65	60	22.0385	0	1	0	0	35.6	113	15	20	20	20	30	40	15	15	15	20	25	45	22.5	18.75	1318.05	18.96	1619	29.07	27	331.8	2.19	2.52	5.46	0	0	0	0	1	1	1	1	1
68	37	0	1.73	52	17.37	0	1	0	0	46	91	10	15	30	35	70	65	20	15	25	25	60	65	37.5	31.25	774.01	14.88	1394.8	29.72	157	1380	2.48	1.98	5.7	0	0	1	1	1	1	1	1	1
69	60	0	1.73	73	24.39	1	1	1	0	42.2	123	25	25	30	30	40	50	30	20	25	20	35	50	31.25	25	1193.82	14.82	1154.6	22.09	53	1040.3	2.02	2.68	4.57	1	0	1	1	1	1	1	1	1
70	40	0	1.73	75.5	25.22	0	1	0	0	47.3	162	40	30	30	20	20	20	20	25	25	20	15	30	25	21.25	1221.06	19.92	1312.1	26.44	29	639.6	2.16	2.55	4.92	1	1	1	0	0	1	1	1	1
71	57	0	1.7	71	24.56	1	1	1	0	41.1	124	25	25	30	30	40	50	30	20	25	20	35	50	31.25	25	1192.02	15.79	1153	27.08	54	1037.6	2.02	2.28	4.58	1	0	1	1	1	1	1	1	1
72	55	0	1.69	59.5	20.83	0	1	0	0	41.2	112	40	25	35	45	50	70	20	20	20	35	50	100	38.75	31.25	1156.2	17.61	980.8	26.11	15	243.2	2.3	1.69	5.17	1	0	1	1	1	1	1	1	1
73	60	0	1.71	72	24.3374	1	1	1	0	43	110	25	25	30	30	40	50	30	20	25	20	35	50	31.25	25	1207.02	14.66	1173.3	21.1	58	1049	2.32	2.78	4.69	1	0	1	1	1	1	1	1	1
74	28	0	1.72	53.1	17.95	1	1	0	0	47.6	101	20	25	20	5	15	15	15	20	15	10	20	30	16.25	16.25	994.3	14.71	1328.1	26.85	29	1694	2.3	1.94	5.41	0	0	0	0	0	1	0	1	0
75	38	0	1.74	52.4	17.3061	0	1	0	0	47.6	90	10	15	30	35	70	65	20	15	25	25	60	65	37.5	31.25	769.21	14.85	1404.7	27.7	156	1373	2.66	2.08	5.6	0	0	1	1	1	1	1	1	1
76	33	0	1.66	48.06	17.44	0	1	0	1	47.71	162	35	20	10	20	85	85	25	15	10	10	60	70	33.75	23.75	1384.61	15.59	1080	22.48	18	130.6	2.31	2.18	5.03	1	0	0	0	1	1	1	1	1
77	52	0	1.7	60.31	20.8687	0	1	0	0	43.5	112	40	25	35	45	50	70	20	20	20	35	50	100	38.75	31.25	1159.18	15.58	981.8	28.31	20	250.3	2.35	1.74	5.21	1	0	1	1	1	1	1	1	1
78	27	0	1.76	55.9	18.05	1	1	0	0	45	102	20	25	20	5	15	15	15	20	15	10	20	30	16.25	16.25	995.38	14.83	1330.9	26.97	34	1683.9	1.92	2.08	5.3	0	0	0	0	0	1	0	1	0
79	36	0	1.78	54.6	17.23	0	1	0	0	45.3	89	10	15	30	35	70	65	20	15	25	25	60	65	37.5	31.25	779.2	15.27	1434.3	31.71	152	1393	2.56	2.58	5.2	0	0	1	1	1	1	1	1	1
80	55	0	1.73	79	26.4	0	1	1	0	50	111	35	30	25	20	50	50	35	20	15	20	50	35	31.25	26.25	1079.82	13.48	1013.5	22.49	34	251.5	2.4	1.87	5.6	1	1	0	0	1	1	1	1	1
81	32	0	1.61	55	21.21	1	1	0	1	49.4	97	20	20	15	10	40	40	20	25	20	20	25	35	21.25	22.5	498.98	14.84	1035.2	21.39	82	1975.9	2.6	2.16	5.81	0	0	0	0	1	1	1	1	1
82	57	0	1.77	81.6	26.04	0	1	1	0	50	114	35	30	25	20	50	50	35	20	15	20	50	35	31.25	26.25	1095.7	14.29	1023	23.3	37	252	2.12	1.9	5.7	1	1	0	0	1	1	1	1	1
83	36	0	1.69	85.9	30.07	1	1	0	0	40.78	117	25	30	30	25	30	35	20	25	25	25	30	45	28.75	26.25	1049.58	13.97	614.4	25.75	53	221.2	2.3	1.97	4.5	0	1	1	0	1	1	1	1	1
84	56	0	1.72	77.3	26.13	0	1	1	0	49	111	35	30	25	20	50	50	35	20	15	20	50	35	31.25	26.25	1081.76	14.4	1024	23.48	34	253	2.41	1.88	5.68	1	1	0	0	1	1	1	1	1
85	36	0	1.66	59.5	21.59	1	1	0	1	50	99	20	20	15	10	40	40	20	25	20	20	25	35	21.25	22.5	518.91	14.8	1036	22.31	87	1974	2.46	2	5.8	0	0	0	0	1	1	1	1	1
86	52	0	1.65	56.62	20.8	0	1	0	0	42.2	109	40	25	35	45	50	70	20	20	20	35	50	100	38.75	31.25	1159.19	16.58	979.5	27.22	13	251.4	2.1	1.67	5.2	1	0	1	1	1	1	1	1	1
87	35	0	1.7	87.7	30.34	1	1	0	0	40.72	120	25	30	30	25	30	35	20	25	25	25	30	45	28.75	26.25	1049.39	13.78	614.61	24.65	54	221.8	2.19	1.98	4.46	0	1	1	0	1	1	1	1	1
88	25	0	1.73	78.7	26.2975	0	1	0	0	42.69	97	10	5	15	5	20	5	10	5	5	5	15	5	11.25	7.5	1260.7	14.48	1575.4	28.08	22	453.81	2.33	2.87	5.15	0	0	0	0	0	0	0	0	0
89	31	0	1.62	56.5	21.52	1	1	0	1	50.7	97.6	20	20	15	10	40	40	20	25	20	20	25	35	21.25	22.5	508.99	13.82	1037.1	23.35	86	1973.9	2.44	2.14	5.79	0	0	0	0	1	1	1	1	1
90	41	0	1.78	79.5	25.09	0	1	0	0	46.7	164	40	30	30	20	20	20	20	25	25	20	15	30	25	21.25	1219.04	19.99	1312.9	26.56	30	637.7	2.18	2.95	4.87	1	1	1	0	0	1	1	1	1
91	40	0	1.65	83.5	30.67	1	1	0	0	40.9	117	25	30	30	25	30	35	20	25	25	25	30	45	28.75	26.25	1049.47	13.86	614.49	23.85	58	220	2.11	1.99	4.45	0	1	1	0	1	1	1	1	1
92	45	0	1.72	58.9	19.91	0	1	0	0	47.52	123	15	25	25	35	45	30	20	25	20	20	35	40	32.5	25	1153.88	22.18	526.4	10.47	94	291.7	2.63	2.73	5.26	0	0	0	1	1	1	1	1	1
93	62	0	1.7	65	22.4913	0	1	0	0	48.1	131	20	30	50	40	55	70	15	25	40	40	40	70	43.75	36.25	742.21	18.52	1091.8	26.36	34	177.7	2.27	2.24	5.25	0	1	1	1	1	1	1	1	1
94	48	0	1.69	56.5	19.78	0	1	0	0	47.38	121	15	25	25	35	45	30	20	25	20	20	35	40	32.5	25	1154.8	22.2	527.2	10.55	98	292.5	2.71	2.8	5.42	0	0	0	1	1	1	1	1	1
95	33	0	1.67	66.2	23.73	1	1	0	1	41.2	97	20	10	15	25	60	15	20	15	10	15	60	20	27.5	25	170.26	17.5	1364.8	21.51	4	132.3	2.22	1.74	6.02	0	0	0	0	1	0	1	1	1
96	45	0	1.69	57.1	19.99	0	1	0	0	47.6	122	15	25	25	35	45	30	20	25	20	20	35	40	32.5	25	1155.84	22.34	528.3	10.66	96	293.6	2.52	2.91	5.34	0	0	0	1	1	1	1	1	1
97	62	0	1.72	67	22.64	0	1	0	0	48.2	131	20	30	50	40	55	70	15	25	40	40	40	70	43.75	36.25	742.4	18.61	1089.81	26.45	36	177.61	2.36	2.33	5.24	0	1	1	1	1	1	1	1	1
98	49	0	1.66	62	22.5	0	1	0	0	38.41	96	15	15	10	5	25	25	20	20	15	10	25	30	13.75	17.5	660.82	17.49	1091	38.55	22	424.4	2.17	1.69	5.87	0	0	0	0	0	1	0	1	0
99	32	0	1.66	64.5	23.4	1	1	0	1	41.01	96	20	10	15	25	60	15	20	15	10	15	60	20	27.5	25	170.17	17.31	1365.9	21.5	8	133.4	2.18	1.83	6.04	0	0	0	0	1	0	1	1	1
100	51	0	1.68	64	22.67	0	1	0	0	38.29	97	15	15	10	5	25	25	20	20	15	10	25	30	13.75	17.5	660.91	17.67	1087	38.44	27	426.3	2.36	1.73	5.76	0	0	0	0	0	1	0	1	0
101	59	0	1.68	63	22.32	0	1	0	0	48.6	134	20	30	50	40	55	70	15	25	40	40	40	70	43.75	36.25	742.32	18.43	1090.79	26.27	32	177.49	2.18	2.15	5.26	0	1	1	1	1	1	1	1	1
102	50	0	1.67	63	22.5895	0	1	0	0	38.5	95	15	15	10	5	25	25	20	20	15	10	25	30	13.75	17.5	661.06	17.58	1088	38.36	23	425.5	2.28	1.72	5.68	0	0	0	0	0	1	0	1	0
103	42	0	1.74	76	25.1	0	1	0	0	48.5	160	40	30	30	20	20	20	20	25	25	20	15	30	25	21.25	1220.08	19.91	1311	26.62	34	638.5	2.14	2.75	4.91	1	1	1	0	0	1	1	1	1
104	32	0	1.69	80.2	28.08	1	1	0	0	42.48	98	5	5	10	65	75	70	5	5	10	50	55	20	38.75	30	82.43	15.19	699	27.18	3	391	2.08	2.03	4.83	0	0	0	1	1	1	1	1	1
105	59	1	1.54	44.42	18.733	0	1	0	0	42.37	117	20	20	10	15	30	55	20	15	10	10	25	35	18.75	15	53.65	16.98	1443.02	26.96	22	105.72	2.34	2.49	4.87	0	0	0	0	1	1	1	1	1
106	70	1	1.52	48.8	21.12	0	1	0	0	40.61	96	30	25	30	25	35	30	25	20	25	30	35	30	28.75	27.5	691.29	18.19	984.6	23.49	22	543.32	2.16	1.41	4.65	1	0	1	1	1	1	1	1	1
107	48	0	1.55	67.4	28.05	0	1	0	0	45.9	118	5	15	15	25	45	30	10	15	10	10	45	25	25	20	156.49	13.55	330	11.07	6	64.7	2.26	1.02	3.23	0	0	0	0	1	1	1	1	1
108	31	0	1.68	79.1	28.03	1	1	0	0	42.53	93	5	5	10	65	75	70	5	5	10	50	55	20	38.75	30	82.38	15.14	704	27.12	3	387	2.12	1.98	4.7	0	0	0	1	1	1	1	1	1
109	52	0	1.59	70.6	27.93	0	1	0	0	48	120	5	15	15	25	45	30	10	15	10	10	45	25	25	20	156.52	13.36	325	11.11	11	62.71	2.45	1.12	3.18	0	0	0	0	1	1	1	1	1
110	22	0	1.69	75.3	26.36	0	1	0	0	42.71	94	10	5	15	5	20	5	10	5	5	5	15	5	11.25	7.5	1260.72	14.53	1573.9	26.16	18	453.59	2.28	2.83	5.19	0	0	0	0	0	0	0	0	0
111	49	1	1.55	45	18.7304	0	1	0	0	42.4	114	20	20	10	15	30	55	20	15	10	10	25	35	18.75	15	53.68	16.96	1443	26.94	23	105.7	2.32	2.5	4.88	0	0	0	0	1	1	1	1	1
112	37	0	1.71	68.8	23.53	1	1	0	1	41.09	95	20	10	15	25	60	15	20	15	10	15	60	20	27.5	25	170.35	17.39	1366.7	21.49	9	134.2	2.2	1.8	6.03	0	0	0	0	1	0	1	1	1
113	58	1	1.64	79	29.3847	0	1	1	0	42.71	137	20	20	15	15	15	25	40	35	30	25	35	20	16.25	31.25	67.95	15.98	1159.71	35.81	58	347.71	2.38	2.08	6.77	1	1	1	0	1	0	0	1	0
114	22	0	1.68	74	26.22	0	1	0	0	42.7	94	10	5	15	5	20	5	10	5	5	5	15	5	11.25	7.5	1260.74	14.52	1574.5	27	17	453.7	2.26	2.82	5.2	0	0	0	0	0	0	0	0	0
115	49	0	1.56	68	27.94	0	1	0	0	47	121	5	15	15	25	45	30	10	15	10	10	45	25	25	20	156.51	13.45	328	11.1	8	63.7	2.36	1.05	3.2	0	0	0	0	1	1	1	1	1
116	33	0	1.7	81	28.03	1	1	0	0	42.5	96	5	5	10	65	75	70	5	5	10	50	55	20	38.75	30	82.41	15.11	701	27.2	3	390	2.11	2.01	4.8	0	0	0	1	1	1	1	1	1
117	67	1	1.55	47	19.56	0	1	0	0	38.69	77	15	20	20	20	55	55	20	20	25	25	25	50	28.75	23.75	952.6	15.95	1043.02	22.07	10	334.92	2.2	1.9	4.92	0	0	0	0	1	1	1	1	1
118	38	1	1.55	66	27.47	0	1	0	0	36.41	91	10	10	15	15	20	15	10	10	15	15	25	15	15	16.25	53.67	14.09	1124.41	31.52	9	109.61	2.71	2.77	4.05	0	0	0	0	0	0	0	0	0
119	69	1	1.59	49.6	19.6282	0	1	0	0	38.71	80	15	20	20	20	55	55	20	20	25	25	25	50	28.75	23.75	952.5	15.99	1043.01	22.09	15	334.91	2.21	1.91	4.94	0	0	0	0	1	1	1	1	1
120	36	0	1.73	83.7	27.97	1	1	0	0	42.49	97	5	5	10	65	75	70	5	5	10	50	55	20	38.75	30	82.42	15.16	700	27.3	3	392	2.09	2.02	4.87	0	0	0	1	1	1	1	1	1
121	68	1	1.6	50.4	19.68	0	1	0	0	38.7	77	15	20	20	20	55	55	20	20	25	25	25	50	28.75	23.75	952.1	16	1042.97	22.1	11	334.87	2.22	1.89	4.93	0	0	0	0	1	1	1	1	1
122	69	1	1.49	48.15	21.111	0	1	0	0	40.63	97	30	25	30	25	35	30	25	20	25	30	35	30	28.75	27.5	691.3	18.2	985.4	23.5	21	543.31	2.14	1.42	4.63	1	0	1	1	1	1	1	1	1
123	47	0	1.54	66	27.83	0	1	0	0	47.1	124	5	15	15	25	45	30	10	15	10	10	45	25	25	20	156.53	13.44	329	11.12	7	63.69	2.37	1.01	3.19	0	0	0	0	1	1	1	1	1
124	24	1	1.69	47.9	16.77	0	1	0	0	49.47	105	10	5	5	10	15	5	15	5	5	0	5	0	8.75	3.75	725.75	13.11	785.57	24.34	22	356.47	2.5	1.91	5.19	0	0	0	0	0	0	0	0	0
125	49	1	1.56	45.58	18.7304	0	1	0	0	42.41	113	20	20	10	15	30	55	20	15	10	10	25	35	18.75	15	53.69	16.97	1443.01	26.95	23	105.71	2.33	2.51	4.89	0	0	0	0	1	1	1	1	1
126	37	1	1.59	69	27.3	0	1	0	0	36.37	95	10	10	15	15	20	15	10	10	15	15	25	15	15	16.25	53.71	14.13	1124.37	31.56	8	109.57	2.7	2.72	4.06	0	0	0	0	0	0	0	0	0
127	48	1	1.55	45	18.7304	0	1	0	0	42.42	112	20	20	10	15	30	55	20	15	10	10	25	35	18.75	15	53.7	16.93	1442.97	26.91	24	105.67	2.29	2.5	4.88	0	0	0	0	1	1	1	1	1
128	26	1	1.7	48.1	16.6524	0	1	0	0	49.51	107	10	5	5	10	15	5	15	5	5	0	5	0	8.75	3.75	725.79	13.15	785.61	24.38	21	356.51	2.51	1.9	5.14	0	0	0	0	0	0	0	0	0
129	32	1	1.61	58	22.3756	0	0	0	1	49.41	106	20	15	15	10	10	5	20	15	15	15	25	15	12.5	17.5	976.66	18.15	1218.29	25.38	49	1156.89	2.59	2.21	5.17	0	0	0	0	0	0	0	0	0
130	34	1	1.62	74.3	28.3	0	1	0	0	39.39	94	5	10	10	10	5	5	5	10	0	5	5	5	8.75	5	768.96	17.45	661.71	13.77	4	281.92	2.23	1.77	5.15	0	0	0	0	0	0	0	0	0
131	30	1	1.6	57.3	22.3756	0	0	0	1	49.37	107	20	15	15	10	10	5	20	15	15	15	25	15	12.5	17.5	976.67	18.16	1218.28	25.37	48	1156.88	2.61	2.17	5.16	0	0	0	0	0	0	0	0	0
132	29	1	1.57	42	17.04	0	1	0	0	42.72	123	20	15	15	10	15	15	25	20	20	5	10	20	13.75	13.75	500.3	16.52	1057.62	29.34	55	617.48	2.39	1.89	4.2	0	0	0	0	0	0	0	0	0
133	31	1	1.62	58.7	22.3756	0	0	0	1	49.42	102	20	15	15	10	10	5	20	15	15	15	25	15	12.5	17.5	976.62	18.11	1218.33	25.42	53	1156.93	2.6	2.22	5.21	0	0	0	0	0	0	0	0	0
134	34	1	1.57	70.4	28.56	0	1	0	0	39.4	95	5	10	10	10	5	5	5	10	0	5	5	5	8.75	5	768.91	17.4	661.67	13.72	5	281.87	2.25	1.79	5.1	0	0	0	0	0	0	0	0	0
135	39	1	1.63	47	17.69	0	1	0	0	43.87	83	15	10	25	25	15	25	20	15	15	20	10	25	18.75	15	736.87	19.26	1001.32	21.58	31	903.71	2.79	2.45	5.78	0	0	0	0	0	0	0	0	0
136	25	1	1.65	45	16.53	0	1	0	0	49.52	106	10	5	5	10	15	5	15	5	5	0	5	0	8.75	3.75	725.8	13.16	785.62	24.39	20	356.52	2.49	1.89	5.18	0	0	0	0	0	0	0	0	0
137	63	1	1.53	57	24.3496	0	1	1	0	47.4	130	20	15	20	10	15	35	20	10	15	10	15	40	15	12.5	482.32	13.75	885.8	32.1	39	906.2	2.43	2.25	5.82	0	0	0	0	0	1	1	1	1
138	39	1	1.6	70.5	27.54	0	1	0	0	36.42	96	10	10	15	15	20	15	10	10	15	15	25	15	15	16.25	53.66	14.14	1124.42	31.57	7	109.62	2.69	2.76	4.01	0	0	0	0	0	0	0	0	0
139	38	1	1.61	45	17.36	0	1	0	0	43.92	80	15	10	25	25	15	25	20	15	15	20	10	25	18.75	15	736.82	19.22	1001.27	21.54	27	903.67	2.75	2.47	5.79	0	0	0	0	0	0	0	0	0
140	71	1	1.49	48.15	21.111	0	1	0	0	40.58	98	30	25	30	25	35	30	25	20	25	30	35	30	28.75	27.5	691.33	18.15	983.5	23.54	17	543.27	2.15	1.43	4.64	1	0	1	1	1	1	1	1	1
141	28	1	1.52	39.4	17.05	0	1	0	0	42.67	119	20	15	15	10	15	15	25	20	20	5	10	20	13.75	13.75	500.25	16.47	1057.57	29.29	60	617.47	2.33	1.9	4.16	0	0	0	0	0	0	0	0	0
142	27	1	1.56	41.6	17.1	0	1	0	0	42.71	122	20	15	15	10	15	15	25	20	20	5	10	20	13.75	13.75	500.29	16.51	1057.61	29.33	56	617.51	2.37	1.91	4.21	0	0	0	0	0	0	0	0	0
143	35	1	1.61	73.7	28.43	0	1	0	0	39.41	96	5	10	10	10	5	5	5	10	0	5	5	5	8.75	5	768.95	17.44	661.72	13.76	6	281.91	2.24	1.81	5.14	0	0	0	0	0	0	0	0	0
144	37	1	1.62	46	17.5278	0	1	0	0	43.91	83	15	10	25	25	15	25	20	15	15	20	10	25	18.75	15	736.86	19.27	1001.31	21.59	32	903.72	2.8	2.46	5.8	0	0	0	0	0	0	0	0	0
